# Supplementary material for: TCR Sequencing Can Identify and Track Glioma-Infiltrating T Cells after DC Vaccination
Source: Oxford University Press journal article supplement (doi:10.1158/2326-6066.cir-15-0240), 2016-03-11
Supplement: 23266066cir150240-sup-155765_1_supp_3315836_x16hk2.docx [file 23266066cir150240-sup-155765_1_supp_3315836_x16hk2.docx]

**Supplementary Table 1: Clinical Characteristics**

| **Patient** | **Diagnosis** | **TTP** | **OS** | **Molecular Pathology** | | | |
| --- | --- | --- | --- | --- | --- | --- | --- |
| **IDH** | **MGMT** | **EGFR** | **PTEN** |
| 15-532 | ND GBM | 2.3 | 10.2 | WT | + | Amplified | + |
| 1-708 | ND GBM | 8.0 | 28.7 | WT | + | vIII+ | + |
| 08-81-3 | ND GBM | 1.6 | 6.7 | WT | + | - | + |
| 13-209 | ND GBM | 45.1 | 48.3 | WT | - | vIII+ | NT |
| 03-05-02 | ND GBM | 15.3 | 23.5 | WT | + | - | Monosomy 10 |
| 21-828 | ND GBM | 3.9 | 6.3 | WT | + | vIII+ | - |
| 17-232 | ND GBM | 57.6 | 71.3 | WT | - | vIII+ | - |
| 19-539 | ND GBM | 2.6 | 30.0 | WT | - | vIII+ | + |
| 16-07-02 | ND GBM | 9.7 | 20.73 | WT | + | - | - |
| 10-956 | Rec GBM | 0.5 | 11.4 | WT | NT | NT | NT |
| 32-204 | Rec GBM | 12.6 | 12.6 | WT | + | - | Monosomy 10 |
| 6-815 | Rec GBM | 0.9 | 4.5 | WT | NT | vIII+ | NT |
| 27-934 | Rec GBM | 85.8 | 85.8 | WT | + | - | + |
| 33-296 | Rec GBM | 1.2 | 8.1 | WT | 0-5%+ | NT | + |
| 34-730 | Rec GBM | 2.3 | 5.2 | WT | 0-10%+ | NT | + |

TTP and OS times reported in months as of 7/28/2015. ND – newly diagnosed. Rec – recurrent. WT – wild type. NT – not tested. Testing for MGMT was initially done by assessing level of epression by IHC and later by analysis of promoter methylation. MGMT + indicates intact expression of MGMT by IHC or an unmethylated promoter. MGMT- indicates that either no MGMT was detected by IHC or promoter methylation was detected. vIII+ indicates the presence of EGFRvIII deletion. For PTEN expression + indicates intact expression.
