# Supplementary material for: TCR Sequencing Can Identify and Track Glioma-Infiltrating T Cells after DC Vaccination
Source: Oxford University Press journal article supplement (doi:10.1158/2326-6066.cir-15-0240), 2016-03-11
Supplement: 23266066cir150240-sup-155765_1_supp_3315838_p16hk2.docx [file 23266066cir150240-sup-155765_1_supp_3315838_p16hk2.docx]

**Supplementary Table 3:**

| **Analysis of Maximum Likelihood Estimates: TTP** | | | | |
| --- | --- | --- | --- | --- |
| **Parameter** | **Pr > ChiSq** | **Hazard** | **95% Hazard Ratio Confidence** | |
| **Ratio** | **Limits** | |
| **Time to Progression** | 0.0442 | 0.252 | 0.066 | 0.965 |
| **Overall Survival** | 0.0461 | 0.277 | 0.078 | 0.978 |
