# Supplementary material for: TCR Sequencing Can Identify and Track Glioma-Infiltrating T Cells after DC Vaccination
Source: Oxford University Press journal article supplement (doi:10.1158/2326-6066.cir-15-0240), 2016-03-11

**Supplementary Figure 2:**

**Single cox model**

| **Analysis of Maximum Likelihood Estimates: TTP** | | | | |
| --- | --- | --- | --- | --- |
| **Parameter** | **Pr > ChiSq** | **Hazard** | **95% Hazard Ratio Confidence** | |
| **Ratio** | **Limits** | |
| **Median_Est_TIL** | 0.835 | 1.258 | 0.138 | 11.503 |
| **Log(Median_Clonality)** | 0.3543 | 11.838 | 0.066 | 1950.753 |

| **Analysis of Maximum Likelihood Estimates: OS** | | | | |
| --- | --- | --- | --- | --- |
| **Parameter** | **Pr > ChiSq** | **Hazard** | **95% Hazard Ratio Confidence** | |
| **Ratio** | **Limits** | |
| **Median_Est_TIL** | 0.8375 | 1.260 | 0.016 | 49.804 |
| **Log(Median_Clonality)** | 0.3544 | 11.388 | 0.066 | 1959.735 |

**Box Plot between the new dataset (6 patients) and previous received dataset (15 patients)**


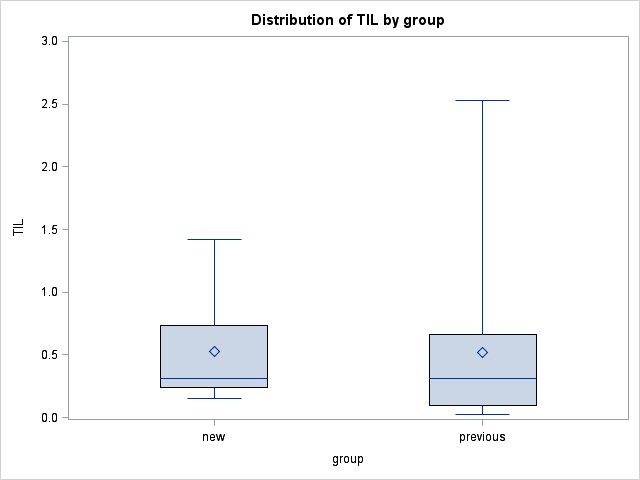

Supplement: 23266066cir150240-sup-155765_1_supp_3319616_f19ry6.docx [file 23266066cir150240-sup-155765_1_supp_3319616_f19ry6.docx]
